# Supplementary material for: PARP inhibitor exerts an anti-tumor effect via LMO2 and synergizes with cisplatin in natural killer/T cell lymphoma
Source: Springer Nature journal article supplement (doi:10.1186/s12916-023-02904-9), 2023-07-13
Supplement: MOESM2 [file 25767574]

**Table S1. Primers for quantitative real-time PCR.**

| Genes               | Sequence of the primer (5' to 3') |
|---------------------|-----------------------------------|
| <i>PARP1-F</i>      | CCACACACAATGCGTATGAC              |
| <i>PARP1-R</i>      | CCACAGCAATCTTCGGTTA               |
| <i>XRCCI-F</i>      | AACTCGTACCCCAGCCACA               |
| <i>XRCCI-R</i>      | AGCACCCTACCACACCCTG               |
| <i>APEX1-F</i>      | GATTAGATTGGGTAAAGGAAGAAGC         |
| <i>APEX1-R</i>      | AGTATTGATGAGAGAGTCCAGGCA          |
| <i>FEN1-F</i>       | TGCTAATGCGACACCTGACTG             |
| <i>FEN1-R</i>       | CCCAATACCCCGGATACTCT              |
| <i>DNAIlgase1-F</i> | CTTTGTGGAGACAGAGGGGCG             |
| <i>DNAIlgase1-R</i> | TCTCGTAGGTGGCATCAACATC            |
| <i>DNAIlgase3-F</i> | GCTATGAAGGTGGGGGAG                |
| <i>DNAIlgase3-R</i> | GTGGAGGGTGGCAAGTAAA               |
| <i>POLB-F</i>       | TAGCAAAAATACCCACACAAA             |
| <i>POLB-R</i>       | ATGGACCAATGCCACTAACT              |
| <i>RPA1-F</i>       | GGGAATGGGTTCTACTGTTT              |
| <i>RPA1-R</i>       | GTACGGATCTGACTTTTGTTG             |
| <i>PALB2-F</i>      | GTTCCGTAGATGTGAGTGCC              |
| <i>PALB2-R</i>      | TCTGCGAAGTGCCAGGTATA              |
| <i>XPA-F</i>        | TAACCAAAACAGAGGCAAAA              |
| <i>XPA-R</i>        | ACCCCAAACCTTCAAGAGACC             |
| <i>MRE11-F</i>      | TACGACTGCGAGTGGACTAT              |
| <i>MRE11-R</i>      | CTCTATGCCTGAAAAAATGG              |
| <i>RAD51-F</i>      | CTCGCTGATGAGTTTGGTGT              |
| <i>RAD51-R</i>      | CAGGGAGAGTCGTAGATTTTGC            |
| <i>ATM-F</i>        | ATTACGGGTGTTGAAGGTGT              |
| <i>ATM-R</i>        | TCATGGTCCAGTCAAAGAGT              |
| <i>GAPDH-F</i>      | CAGGAGGCATTGCTGATGAT              |
| <i>GAPDH-R</i>      | GAAGGCTGGGGCTCATT                 |

**Table S2. Information of antibodies applied in immunohistochemistry (IHC), immunofluorescence (IF), co-immunoprecipitation (Co-IP) and western blotting (WB).**

| Antibody                                 | Sources        |                   |
|------------------------------------------|----------------|-------------------|
| pADPr, 1:100 (IF), 1:1000 (WB)           | Santa Cruz     | Cat# sc-56198     |
| p-H2A.X (Ser139) 1:100 (IF), 1:1000 (WB) | CST            | Cat# 9718         |
| PARP1, 1:1000 (WB)                       | Abcam          | Cat# ab194586     |
| APEX1, 1:1000 (WB)                       | Abcam          | Cat# ab92744      |
| XRCC1, 1:1000 (WB)                       | Abcam          | Cat# ab134056     |
| LIG3, 1:500 (WB)                         | Proteintech    | Cat# 26583-1-AP   |
| p-ATM (Ser1981), 1:1000 (WB)             | CST            | Cat# 5883         |
| p-CBK2 (Thr68), 1:1000 (WB)              | CST            | Cat# 2197         |
| p-P53 (Ser15), 1:1000 (WB)               | CST            | Cat# 9286         |
| BCL2, 1:2000 (WB)                        | Proteintech    | Cat# 60178-1-Ig   |
| BAX, 1:2000 (WB)                         | Proteintech    | Cat# 60267-1-Ig   |
| Cleaved caspase 3, 1:1000 (WB)           | CST            | Cat# 9661         |
| Cleaved PARP, 1:1000 (WB)                | CST            | Cat# 5625         |
| Cyclin A, 1:500 (WB)                     | Abcam          | Cat# ab32498      |
| CDK2, 1:500 (WB)                         | Proteintech    | Cat# 60312-1-Ig   |
| GAPDH, 1:3000 (WB)                       | Proteintech    | Cat# 10494-1-AP   |
| LMO2, 1:500 (WB)                         | Abcam          | Cat# ab183328     |
| LMO2, 1:100 (IHC)                        | Abcam          | Cat# ab91652      |
| LMO2, 5 µg per 1 mg protein (Co-IP)      | Santa Cruz     | Cat# sc-65736     |
| 53BP1, 1:1000 (WB)                       | Abcam          | Cat# ab175933     |
| 53BP1, 5 µg per 1 mg protein (Co-IP)     | Santa Cruz     | Cat# sc-515841    |
| Alexa Fluor 594-AffiniPure               | Jackson        | Cat# 805-587-008  |
| Fab Fragment Bovine Anti-Goat IgG,       | ImmunoResearch |                   |
| Fc Fragment Specific, 1:200 (IF)         |                |                   |
| HRP-conjugated Affinipure                | Proteintech    | Cat No. SA00001-2 |
| Goat Anti-Rabbit IgG (H+L), 1:5000 (WB)  |                |                   |
| HRP-conjugated Affinipure                | Proteintech    | Cat No. SA00001-1 |
| Goat Anti-Mouse IgG (H+L), 1:5000 (WB)   |                |                   |

**Table S3. The correlation between LMO2 expression and clinicopathologic features of 67 patients with NKTCL.**

| <b>Variable</b>  | <b>N</b> | <b>LMO2+</b> | <b>LMO2—</b> | <b>P value</b> |
|------------------|----------|--------------|--------------|----------------|
| <b>Total</b>     | 67       | 22           | 45           |                |
| <b>Gender</b>    |          |              |              | 0.101          |
| Male             | 54       | 15           | 39           |                |
| Female           | 13       | 7            | 6            |                |
| <b>Age(year)</b> |          |              |              | 0.550          |
| >60              | 16       | 4            | 12           |                |
| ≤60              | 51       | 18           | 33           |                |
| <b>Ki-67</b>     |          |              |              | 0.253          |
| ≥50              | 58       | 21           | 37           |                |
| <50              | 9        | 1            | 8            |                |
| <b>EBER</b>      |          |              |              | 0.713          |
| Negative         | 1        | 0            | 1            |                |
| Positive         | 66       | 22           | 44           |                |
| <b>LDH</b>       |          |              |              | 0.991          |
| Normal           | 29       | 9            | 20           |                |
| Elevated         | 38       | 13           | 25           |                |
| <b>Stage</b>     |          |              |              | <b>0.022*</b>  |
| I+II             | 33       | 14           | 19           |                |
| III+IV           | 34       | 8            | 26           |                |
| <b>IPI score</b> |          |              |              | 0.781          |
| 0-2              | 46       | 16           | 30           |                |
| 3-5              | 21       | 6            | 15           |                |

**EBER, Epstein-Barr virus encoding RNAs; LDH, lactate dehydrogenase; IPI, international prognostic index. \*P < 0.05.**
