# Supplementary material for: PARP inhibitor exerts an anti-tumor effect via LMO2 and synergizes with cisplatin in natural killer/T cell lymphoma
Source: Springer Nature journal article supplement (doi:10.1186/s12916-023-02904-9), 2023-07-13
Supplement: MOESM3 [file 25767574]

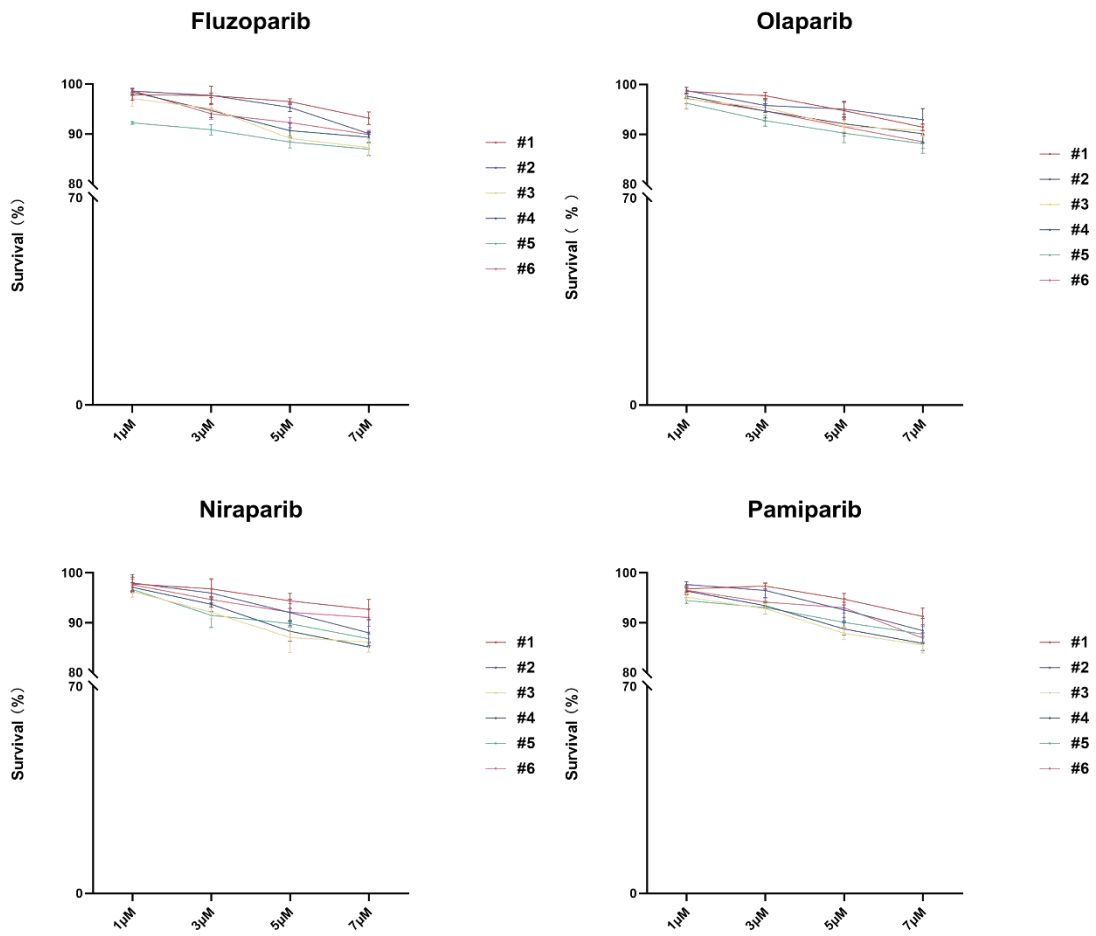

**Fig. S1.** The CCK-8 assays for human normal NK cells (six cases) treated with different concentrations of PARPis (72 hours) were determined to evaluate the toxicity *in vitro*.

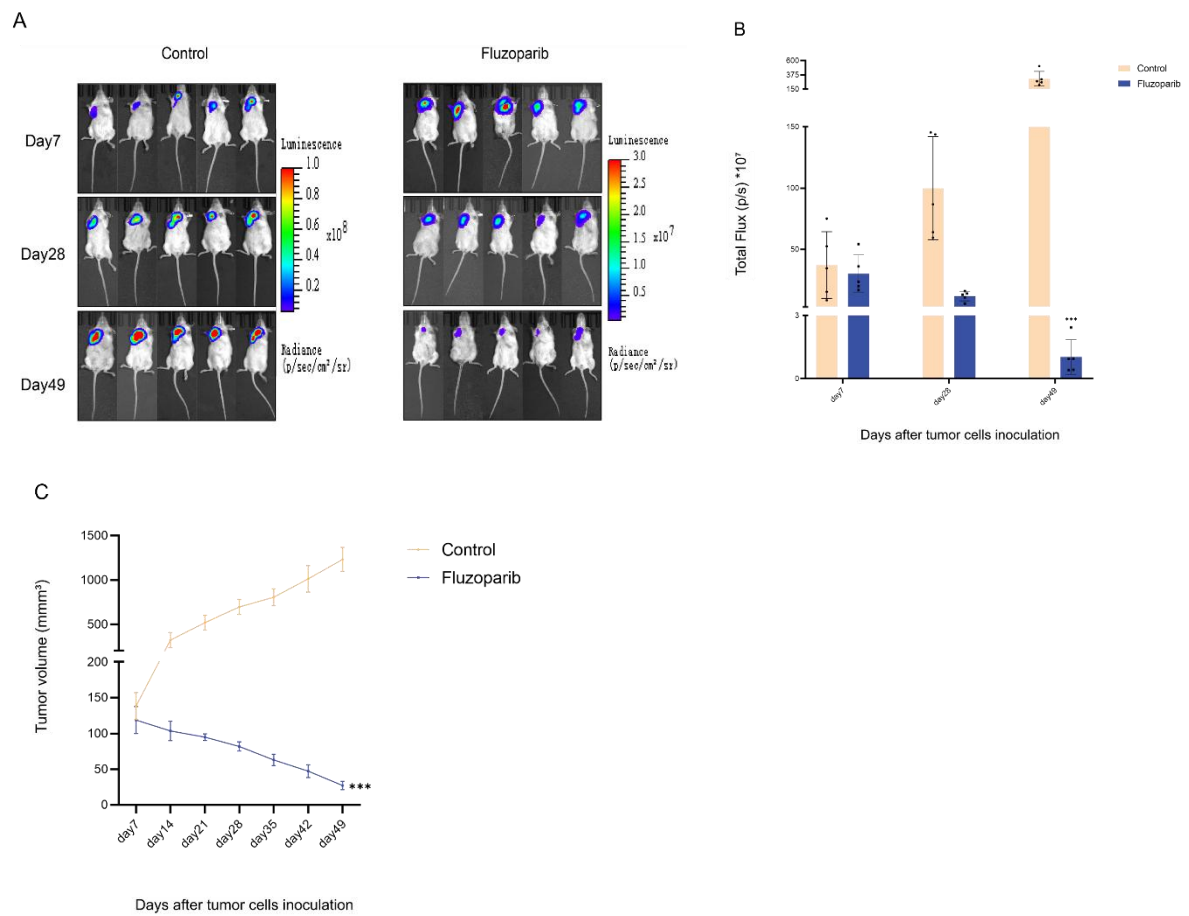

**Fig. S2. Fluzoparib inhibits NKTCL cell growth *in vivo*. (A) IVIS imaging for the tumor burden. (B) Total flux (p/s) \*10<sup>7</sup> values for the result shown in A. (C) Tumor volume (mm<sup>3</sup>) curves during treatment.**

**All data are expressed as the mean ± SD. \*\*\*P < 0.001 vs. the control group.**

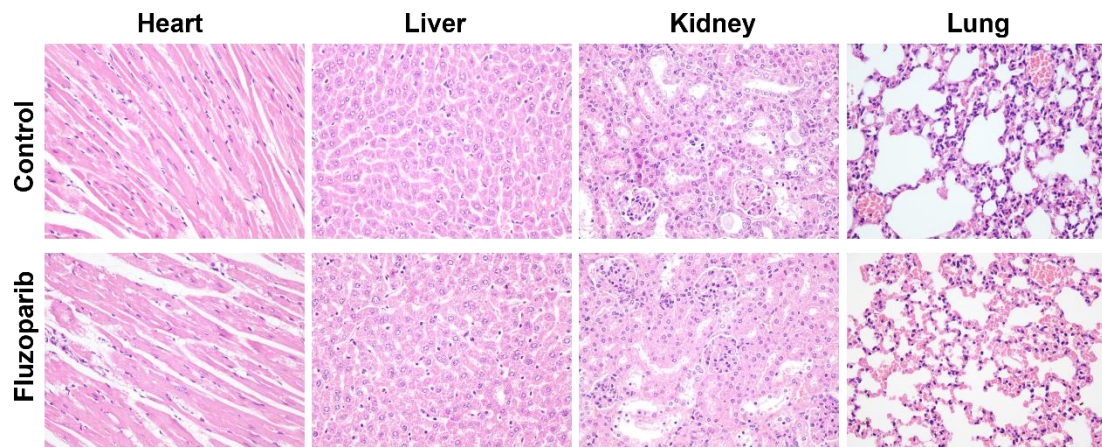

**Fig. S3.** The hematoxylin-eosin staining ( $\times 100$  magnification) for organs (heart, liver, kidney, and lung) of mice treated with fluzoparib or not was determined to evaluate the toxicity of fluzoparib *in vivo*.

## LMO2 expression

---

**Negative**

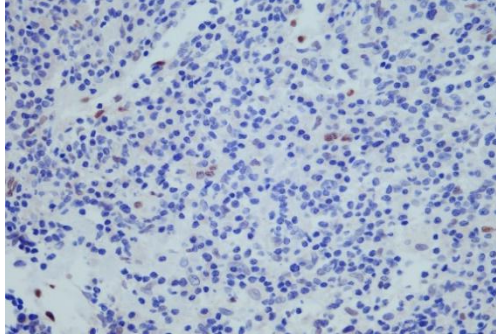

**Positive**

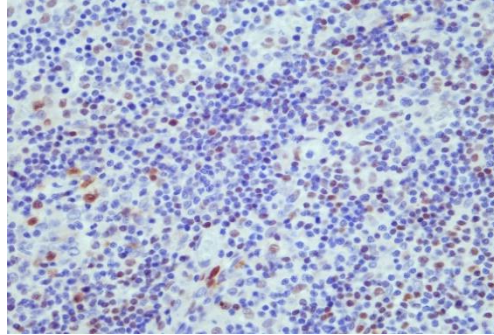

**Fig. S4. Representative images ( $\times 400$  magnification) by immunohistochemistry of NKTCL tissues.**
