# Supplementary material for: PARP inhibitor exerts an anti-tumor effect via LMO2 and synergizes with cisplatin in natural killer/T cell lymphoma
Source: Springer Nature journal article supplement (doi:10.1186/s12916-023-02904-9), 2023-07-13
Supplement: MOESM4 [file 25767574]

**Table S4. Images in Fig. 2E.**

|               | NKYS                                                                                | KHYG1                                                                               | YT                                                                                    |
|---------------|-------------------------------------------------------------------------------------|-------------------------------------------------------------------------------------|---------------------------------------------------------------------------------------|
| <b>pADPr</b>  | 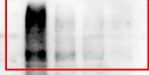   |    |    |
| <b>PARP1</b>  |    |    |    |
| <b>APE1</b>   |    |    |    |
| <b>XRCC1</b>  |  |  |  |
| <b>LIG3</b>   |  |  |  |
| <b>p-H2AX</b> |  |  |  |
| <b>p-ATM</b>  |  |  |  |
| <b>p-CHK2</b> |  |  |  |

|                   |                                                                                     |                                                                                     |                                                                                       |
|-------------------|-------------------------------------------------------------------------------------|-------------------------------------------------------------------------------------|---------------------------------------------------------------------------------------|
| p-P53             | 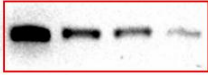   |    |    |
| BCL2              |    |    |    |
| BAX               |    |    |    |
| Cleaved Caspase 3 |    |    |    |
| Cleaved PARP      |  |  |  |
| Cyclin A          |  |  |  |
| CDK2              |  |  |  |
| GAPDH             |  |  |  |

**Table S5. Images in Fig. 3B.**

|              |                                                                                   |
|--------------|-----------------------------------------------------------------------------------|
| <b>LMO2</b>  | 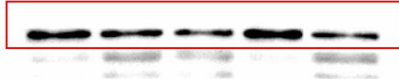 |
| <b>GAPDH</b> |  |

**Table S6. Images in Fig. 3C.**

|              | <b>NKYS</b>                                                                         | <b>YT</b>                                                                             |
|--------------|-------------------------------------------------------------------------------------|---------------------------------------------------------------------------------------|
| <b>LMO2</b>  |  |  |
| <b>GAPDH</b> |  |   |

**Table S7. Images in Fig. 3G.**

|              |                                                                                    |                                                                                     |
|--------------|------------------------------------------------------------------------------------|-------------------------------------------------------------------------------------|
| <b>53BP1</b> |   |   |
| <b>LMO2</b>  |   |   |
| <b>GAPDH</b> |  |  |

**Table S8. Images in Fig. 3H.**

|        | NKYS-shNC                                                                         | NKYS-shLMO2                                                                        | NKYS-sh53BP1                                                                        |
|--------|-----------------------------------------------------------------------------------|------------------------------------------------------------------------------------|-------------------------------------------------------------------------------------|
| p-ATM  | 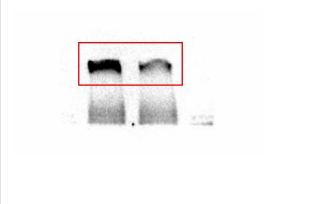 |  |  |
| p-H2AX |  |  |  |
| GAPDH  |  |  |  |

|        | YT-shNC                                                                             | YT-shLMO2                                                                            | YT-sh53BP1                                                                            |
|--------|-------------------------------------------------------------------------------------|--------------------------------------------------------------------------------------|---------------------------------------------------------------------------------------|
| p-ATM  |  |  |  |
| p-H2AX |  |  |  |
| GAPDH  |  |  |  |

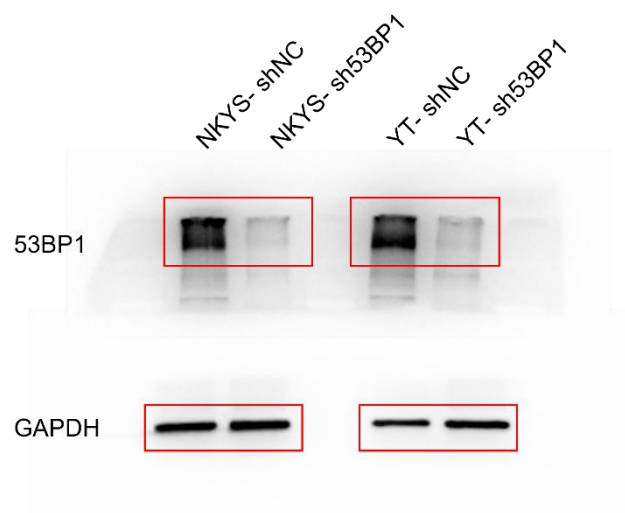

**Fig. S5. Images of shNC and sh53BP1 cells .**
